# Supplementary material for: Genome-wide identification of the OMT gene family in Cucumis melo L. and expression analysis under abiotic and biotic stress
Source: PeerJ. 2023 Dec 14;11:e16483. doi: 10.7717/peerj.16483 (PMC10725674; doi:10.7717/peerj.16483)
Supplement: Supplemental Information 1 [file peerj-11-16483-s001.xlsx]

## Sheet: Sheet1
Table S1. List of quantitative real-time PCR (qRT-PCR) primers for expression analysis of CmOMT genes
COMT Member	Sequence of forward primer	Sequence of reverse primer
CmOMT1	GCTGTTGCCCAATGTGAT	CAGTAACCCAAAGATTAGCCAC
CmOMT2	AATAAAGCAGGAGGGAAGGT	GTGTCCACTCATCAGCACTT
CmOMT3	TCTCACACCACCTCTATTGG	CCCTCCGACGACTTATTACTC
CmOMT4	GGGAGTAATAAGTCGTCGGA	CCACCAACATCTACCAACG
CmOMT5	GTTCCAAACTGACGACCAA	ATCACCAACCTCGCATCA
CmOMT6	CCATCGCACTTTCTCTCAG	CCATCTTTCTGCTTATTCCC
CmOMT7	TCTCACACCACCTCTATTGG	CCCTCCGACGACTTATTACTC
CmOMT8	CGGTGGAAAGAAGTTAGCA	TATGGATGGCGTCTGGAA
CmOMT9	GTTCTTCTTCTCTCCTTTACCG	GCATCACTGGACTTGTTTCC
CmOMT10	CGTTGAAATGGCAGTGGT	AAGAAGAAGAGAGTTGGGAGAG
CmOMT11	GGAAGTTTAGTTGATGTGGGAG	TCAGCCTTAGGAATGGAATC
CmOMT12	GGGTTATCACTTTGCCTGC	AGTAGTCCCATTCCCTCCTC
CmOMT13	TGGTTGATGTTGGTGGAGG	GCATTTGCTGGTGGGATT
CmOMT14	GCTTCAGCATCATCAGGAC	CAACTCGTTCATCTCCGTT
CmOMT15	ACAACCATCACTTCCTTCG	CCCATTTCCAGCCTTAGAT
CmOMT16	CCAATGACACTCCAAGCAG	CGTGGTTATCTCAGCCGTT
CmOMT17	TGCCACACAGATAGCCAA	AGCATCCCACAACCGAAT
CmOMT18	GTGAGCGATGATGAGGAAG	AGTTGGGAAGCGATTTGG
CmOMT19	GGATGGGAGAGATGAGTTGC	ATGGATGGCGTTGGGAAT
CmOMT20	TAGCCGCCTAATGAACCTC	GAAACAAGAAGGGTGTGGC
CmOMT21	TCTTACCCACTCCTCCAAAT	GCGAAGTCCCAAATGTCA
