# Supplementary material for: Genome-wide identification of the OMT gene family in Cucumis melo L. and expression analysis under abiotic and biotic stress
Source: PeerJ. 2023 Dec 14;11:e16483. doi: 10.7717/peerj.16483 (PMC10725674; doi:10.7717/peerj.16483)
Supplement: Supplemental Information 2 [file peerj-11-16483-s002.xlsx]

## Sheet: HEMMER
Identification of conserved domains in CmOMT proteins using the HEMMER tool
gene ID	e-value
MELO3C024861.2	8.7e-79
MELO3C014091.2	9.5e-67
MELO3C027330.2	9.1e-65
MELO3C014098.2	1.4e-53
MELO3C013600.2	5.1e-64
MELO3C018855.2	4.5e-62
MELO3C018859.2	3.1e-61
MELO3C018856.2	3.7e-59
MELO3C018336.2	1.8e-58
MELO3C013310.2	7.4e-55
MELO3C013311.2	7.6e-54
MELO3C013313.2	2.2e-52
MELO3C019324.2	1.2e-29
MELO3C026750.2	5.2e-45
MELO3C009403.2	1.5e-43
MELO3C014089.2	9.9e-35
MELO3C027370.2	2.8e-31
MELO3C000487.2	3.4e-29
MELO3C013315.2	9.2e-25
MELO3C018858.2	2e-24
MELO3C028075.2	2.9e-19

## Sheet: CDD
Identification of conserved domains in CmOMT proteins using the CDD tool
gene ID	Pssm-ID	Short name	Accession no.	Cd length	Interval	e-value
MELO3C027330.2	450167 [Multi-domain]	AdoMet_MTases super family	cl17173	208	26-231	2.2e-75
MELO3C027370.2	450167 [Multi-domain]	AdoMet_MTases super family	cl17173	208	1-125	2.56e-32
MELO3C000487.2	450167 [Multi-domain]	AdoMet_MTases super family	cl17173	208	48-178	2.83e-30
MELO3C028075.2	450167 [Multi-domain]	AdoMet_MTases super family	cl17173	208	11-93	4.27e-18
MELO3C018855.2	450167 [Multi-domain]	AdoMet_MTases super family	cl17173	208	6-220	1.3e-67
MELO3C018856.2	450167 [Multi-domain]	AdoMet_MTases super family	cl17173	208	11-220	3.46e-64
MELO3C018858.2	450167 [Multi-domain]	AdoMet_MTases super family	cl17173	208	136-257	4.1e-24
	400439	dimerization	pfam08100	50	27-76	3.07e-11
MELO3C018859.2	450167 [Multi-domain]	AdoMet_MTases super family	cl17173	208	158-366	1.66e-65
	400439	dimerization	pfam08100	50	64-113	9.12e-11
MELO3C013310.2	450167 [Multi-domain]	AdoMet_MTases super family	cl17173	208	128-339	5.48e-51
	400439	dimerization	pfam08100	50	34-77	1.72e-07
MELO3C013311.2	450167 [Multi-domain]	AdoMet_MTases super family	cl17173	208	128-342	4.82e-55
MELO3C013313.2	450167 [Multi-domain]	AdoMet_MTases super family	cl17173	208	127-339	1.3e-53
	400439	dimerization	pfam08100	50	33-77	4.79e-09
MELO3C013315.2	450167 [Multi-domain]	AdoMet_MTases super family	cl17173	208	147-264	1.16e-23
	400439	dimerization	pfam08100	50	35-80	6.79e-09
MELO3C026750.2	450167 [Multi-domain]	AdoMet_MTases super family	cl17173	208	145-311	4.21e-35
	400439	dimerization	pfam08100	50	25-73	5.88e-18
MELO3C009403.2	450167 [Multi-domain]	AdoMet_MTases super family	cl17173	208	159-353	1.6e-45
	447168	dimerization2 super family	cl06920	50	42-93	5.3e-05
MELO3C014089.2	450167 [Multi-domain]	AdoMet_MTases super family	cl17173	208	144-271	2.33e-39
	dimerization	400439	pfam08100	50	38-89	1.64e-14
MELO3C014091.2	450167 [Multi-domain]	AdoMet_MTases super family	cl17173	208	134-339	7.14e-72
	400439	dimerization	pfam08100	50	29-79	6.44e-15
MELO3C014098.2	450167 [Multi-domain]	AdoMet_MTases super family	cl17173	208	107-324	2.74e-69
	400439	dimerization	pfam08100	50	1-52	1.28e-14
MELO3C024861.2	395719 [Multi-domain]	Methyltransf_2	pfam00891	208	134-338	2.83e-105
	400439	dimerization	pfam08100	50	27-79	6.54e-16
MELO3C018336.2	450167 [Multi-domain]	AdoMet_MTases super family	cl17173	208	138-346	7e-60
	400439	dimerization	pfam08100	50	38-87	6.2e-09
MELO3C019324.2	450167 [Multi-domain]	AdoMet_MTases super family	cl17173	208	120-338	3.59e-51
	400439	dimerization	pfam08100	50	1-49	1.61e-14
MELO3C013600.2	450167 [Multi-domain]	AdoMet_MTases super family	cl17173	208	133-338	3.46e-65
	447168	dimerization2 super family	cl06920	50	30-82	1.81e-06

## Sheet: SMART
Identification of conserved domains in CmOMT proteins using the SMART tool
gene ID	Name	Position		E-value
		Start	End
MELO3C027330.2	Pfam:Methyltransf_2	15	238	1.4e-72
MELO3C027370.2	Pfam:Methyltransf_2	1	136	1e-33
MELO3C000487.2	Pfam:Methyltransf_2	37	179	1.5e-31
MELO3C028075.2	Pfam:Methyltransf_2	2	93	5.1e-20
MELO3C018855.2	Pfam:Methyltransf_2	1	226	4.4e-66
	Pfam:Methyltransf_11	77	166	0.00024
MELO3C018856.2	Pfam:Methyltransf_2	1	226	5.3e-63
MELO3C018858.2	Pfam:Dimerisation	27	76	2.9e-15
	Pfam:Methyltransf_2	125	258	4.6e-28
MELO3C018859.2	Pfam:Dimerisation	64	113	6.8e-17
	Pfam:Methyltransf_2	146	374	5.5e-66
MELO3C013310.2	Pfam:Dimerisation	33	78	2e-10
	Pfam:Methyltransf_2	116	352	1.2e-61
MELO3C013311.2	Pfam:Dimerisation	36	81	5.3e-12
	Pfam:Methyltransf_2	116	356	6.5e-61
MELO3C013313.2	Pfam:Dimerisation	32	77	7.2e-12
	Pfam:Methyltransf_2	115	349	1.1e-59
MELO3C013315.2	Pfam:Dimerisation	34	80	4.9e-09
	Pfam:Methyltransf_2	113	266	5.2e-29
MELO3C026750.2	Pfam:Dimerisation	25	73	1.1e-19
	Pfam:Methyltransf_2	110	317	4.7e-47
MELO3C009403.2	Pfam:Dimerisation	42	93	2.4e-08
	Pfam:Methyltransf_2	133	360	8.7e-51
MELO3C014089.2	Pfam:Dimerisation	38	89	3.2e-17
	Pfam:Methyltransf_2	132	275	3.2e-42
MELO3C014091.2	Pfam:Dimerisation	29	79	6.3e-19
	Pfam:Methyltransf_2	122	353	5.1e-81
MELO3C014098.2	Pfam:Dimerisation	1	52	2.3e-16
	Pfam:Methyltransf_2	95	267	2.6e-62
	Pfam:Methyltransf_2	264	330	1.6e-11
MELO3C024861.2	Pfam:Dimerisation	27	79	5.5e-22
	Pfam:Methyltransf_2	122	345	9.7e-91
MELO3C018336.2	Pfam:Dimerisation	38	87	4.2e-17
	Pfam:Methyltransf_2	126	352	2.4e-64
MELO3C019324.2	Pfam:Dimerisation	1	49	5.9e-16
	Pfam:Methyltransf_2	89	247	2.5e-33
	Pfam:Methyltransf_2	253	355	1.2e-21
MELO3C013600.2	Pfam:Dimerisation	30	82	4.4e-16
	Pfam:Methyltransf_2	122	351	1.2e-71
