# Supplementary material for: Genome-wide identification of the OMT gene family in Cucumis melo L. and expression analysis under abiotic and biotic stress
Source: PeerJ. 2023 Dec 14;11:e16483. doi: 10.7717/peerj.16483 (PMC10725674; doi:10.7717/peerj.16483)
Supplement: Supplemental Information 3 [file peerj-11-16483-s003.xlsx]

## Sheet: Sheet1
Table S3. Information about OMT proteins in Cucumis sativus L.
MATE member	Accession no.	Chr.	Start	End	Strand	Description
CsOMT1	Csa4G091880	4	5976031	5977509	-	Caffeic acid O-methyltransferase; contains IPR016461 (Caffeate O-methyltransferase (COMT) family)
CsOMT2	Csa3G747630	3	28982773	28985293	+	O-methyltransferase, putative; contains IPR016461 (Caffeate O-methyltransferase (COMT) family)
CsOMT3	Csa7G039780	7	2148350	2151769	-	Putative orcinol O-methyltransferase; contains IPR016461 (Caffeate O-methyltransferase (COMT) family)
CsOMT4	Csa7G039280	7	2140976	2142654	+	Orcinol O-methyltransferase; contains IPR016461 (Caffeate O-methyltransferase (COMT) family)
CsOMT5	Csa7G018730	7	1076956	1078803	+	O-methyltransferase, putative; contains IPR016461 (Caffeate O-methyltransferase (COMT) family)
CsOMT6	Csa7G018720	7	1071458	1073055	+	O-methyltransferase, putative; contains IPR016461 (Caffeate O-methyltransferase (COMT) family)
CsOMT7	Csa7G017720	7	1058493	1060679	-	O-methyltransferase, putative; contains IPR016461 (Caffeate O-methyltransferase (COMT) family)
CsOMT8	Csa7G017710	7	1048437	1049862	-	O-methyltransferase, putative; contains IPR016461 (Caffeate O-methyltransferase (COMT) family)
CsOMT9	Csa6G128650	6	9105437	9106623	+	O-methyltransferase, putative; contains IPR016461 (Caffeate O-methyltransferase (COMT) family)
CsOMT10	Csa7G328260	7	11490062	11492327	-	Orcinol O-methyltransferase-like protein; contains IPR016461 (Caffeate O-methyltransferase (COMT) family)
CsOMT11	Csa7G328250	7	11483146	11485331	+	Orcinol O-methyltransferase-like protein; contains IPR016461 (Caffeate O-methyltransferase (COMT) family)
CsOMT12	Csa7G039790	7	2157962	2159425	-	Orcinol O-methyltransferase-like protein; contains IPR016461 (Caffeate O-methyltransferase (COMT) family)
CsOMT13	Csa2G415520	2	21326728	21328843	-	Orcinol O-methyltransferase-like protein; contains IPR016461 (Caffeate O-methyltransferase (COMT) family)
CsOMT14	Csa3G046230	3	3265528	3266316	-	O-methyltransferase-like protein; contains IPR001077 (O-methyltransferase, family 2)
CsOMT15	Csa3G047730	3	3292377	3293126	+	O-methyltransferase-like protein; contains IPR001077 (O-methyltransferase, family 2)
CsOMT16	Csa3G046220	3	3254139	3256404	-	O-methyltransferase-like protein; contains IPR001077 (O-methyltransferase, family 2)
CsOMT17	Csa3G047740	3	3295064	3298913	+	O-methyltransferase-like protein; contains IPR001077 (O-methyltransferase, family 2)
