# Supplementary material for: Genome-wide identification of the OMT gene family in Cucumis melo L. and expression analysis under abiotic and biotic stress
Source: PeerJ. 2023 Dec 14;11:e16483. doi: 10.7717/peerj.16483 (PMC10725674; doi:10.7717/peerj.16483)
Supplement: Supplemental Information 4 [file peerj-11-16483-s004.xlsx]

## Sheet: Sheet1
Table S4. 3-D structures of CmOMT proteins predicted using the PHYRE2 tool.
Gene ID	MATE member	Confidence (%)	Coverage (%)	Percentage of disordered region (%)	Percentage of alpha-helix (%)	Percentage of beta-sheet (%)	Percentage of TM-helix (%)
MELO3C027330	CmOMT1	100	99	6	45	18	0
MELO3C027370	CmOMT2	100	97	7	34	28	0
MELO3C000487	CmOMT3	100	98	7	45	15	0
MELO3C028075	CmOMT4	99.7	98	14	49	15	0
MELO3C018855	CmOMT5	100	99	5	46	19	0
MELO3C018856	CmOMT6	100	97	4	46	19	0
MELO3C018858	CmOMT7	100	95	10	56	7	0
MELO3C018859	CmOMT8	100	88	6	55	13	5
MELO3C013310	CmOMT9	100	96	6	49	13	4
MELO3C013311	CmOMT10	100	95	6	50	14	0
MELO3C013313	CmOMT11	100	94	8	48	13	4
MELO3C013315	CmOMT12	100	92	9	53	11	0
MELO3C026750	CmOMT13	100	93	8	53	11	0
MELO3C009403	CmOMT14	100	95	10	51	13	5
MELO3C014089	CmOMT15	100	90	19	54	8	0
MELO3C014091	CmOMT16	100	96	8	49	14	9
MELO3C014098	CmOMT17	100	95	9	44	15	0
MELO3C024861	CmOMT18	100	99	7	47	14	6
MELO3C018336	CmOMT19	100	94	8	50	13	0
MELO3C019324	CmOMT20	100	92	11	43	17	0
MELO3C013600	CmOMT21	100	95	4	51	15	9
