# Supplementary material for: Genome-wide identification of the OMT gene family in Cucumis melo L. and expression analysis under abiotic and biotic stress
Source: PeerJ. 2023 Dec 14;11:e16483. doi: 10.7717/peerj.16483 (PMC10725674; doi:10.7717/peerj.16483)
Supplement: Supplemental Information 5 [file peerj-11-16483-s005.xlsx]

## Sheet: Sheet1
Table S5 Orthologous relationships between melon and Arabidopsis/watermelon/cucmber.
CsOMT gene ID	AtOMT gene ID	ClOMT gene ID	CsOMT gene ID
CmOMT5	-	Cla97C02G028680	Csa2G415520
CmOMT9	AT4G35150	Cla97C02G030490	Csa7G017710
CmOMT13	-	Cla97C10G195920	Csa3G747630
CmOMT14	AT3G53140	Cla97C10G202790	Csa4G091880
CmOMT20	-	Cla97C02G028680	-
CmOMT21	-	Cla97C02G043200	Csa6G128650
