# Supplementary material for: Genome-wide identification of the OMT gene family in Cucumis melo L. and expression analysis under abiotic and biotic stress
Source: PeerJ. 2023 Dec 14;11:e16483. doi: 10.7717/peerj.16483 (PMC10725674; doi:10.7717/peerj.16483)
Supplement: Supplemental Information 6 [file peerj-11-16483-s006.xlsx]

## Sheet: Sheet1
Table S6 List of GO (gene ontology) terms of CmOMT genes
Class	Term ID	Descrption	P-value	Q-value	Number in input list	Rich factor
Biological Process	GO:0032259	Methylation	2.30676e-32	6.92029e-32	21	0.046
Biological Process	GO:0008152	Metabolic process	0.00369405	0.00554107	21	0.002
Molecular Function	GO:0008171	O-methyltransferase activity	1.99851e-59	2.59806e-58	21	0.553
Molecular Function	GO:0008168	Methyltransferase activity	1.9296e-34	1.25424e-33	21	0.048
Molecular Function	GO:0016741	Transferase activity, transferring one-carbon groups	3.82374e-34	1.65695e-33	21	0.047
Molecular Function	GO:0046983	Protein dimerization activity	1.5517e-27	5.04302e-27	19	0.037
Molecular Function	GO:0005515	Protein binding	2.8031e-19	7.28806e-19	19	0.014
Molecular Function	GO:0050630	(iso)eugenol O-methyltransferase activity	1.58562e-18	3.43551e-18	6	1
Molecular Function	GO:0016740	Transferase activity	5.97727e-14	1.11006e-13	21	0.005
Molecular Function	GO:0003824	Catalytic activity	1.99726e-05	3.24554e-05	21	0.002
Molecular Function	GO:0030786	(RS)-norcoclaurine 6-O-methyltransferase activity	0.00123088	0.00160014	1	1
Molecular Function	GO:0047763	Caffeate O-methyltransferase activity	0.00123088	0.00160014	1	1
Molecular Function	GO:0005488	Binding	0.00203412	0.00240396	19	0.002
