# Supplementary material for: Genome-wide identification of the OMT gene family in Cucumis melo L. and expression analysis under abiotic and biotic stress
Source: PeerJ. 2023 Dec 14;11:e16483. doi: 10.7717/peerj.16483 (PMC10725674; doi:10.7717/peerj.16483)
Supplement: Supplemental Information 7 [file peerj-11-16483-s007.xlsx]

## Sheet: Sheet1
Table S7. Identification of cis-regulatory elements in the promoters of CmOMT genes.
Promoter	Motif	Sequence	Start	End	Cis-regulatory element
CmOMT1	AuxRR-core	GGTCCAT	964	7	Auxin-responsive element
CmOMT1	Box 4	ATTAAT	411	6	Light responsiveness element
CmOMT1	Box 4	ATTAAT	693	6	Light responsiveness element
CmOMT1	CGTCA-motif	CGTCA	719	5	MeJA-responsive element
CmOMT1	CGTCA-motif	CGTCA	1302	5	MeJA-responsive element
CmOMT1	LAMP-element	CTTTATCA	995	8	Light responsiveness element
CmOMT1	LTR	CCGAAA	322	6	Low-temperature responsiveness element
CmOMT1	LTR	CCGAAA	464	6	Low-temperature responsiveness element
CmOMT1	LTR	CCGAAA	1246	6	Low-temperature responsiveness element
CmOMT1	LTR	CCGAAA	1860	6	Low-temperature responsiveness element
CmOMT1	MBS	CAACTG	770	6	Drought-responsive element
CmOMT1	P-box	CCTTTTG	1295	7	GA-responsive element
CmOMT1	P-box	CCTTTTG	1902	7	GA-responsive element
CmOMT1	Sp1	GGGCGG	1017	6	Light responsiveness element
CmOMT1	Sp1	GGGCGG	1591	6	Light responsiveness element
CmOMT1	Sp1	GGGCGG	1595	6	Light responsiveness element
CmOMT1	TCA-element	TCAGAAGAGG	324	9	SA-responsive element
CmOMT1	TCA-element	TCAGAAGAGG	843	9	SA-responsive element
CmOMT1	TCA-element	TCAGAAGAGG	870	9	SA-responsive element
CmOMT1	TCA-element	TCAGAAGAGG	1073	9	SA-responsive element
CmOMT1	TCA-element	TCAGAAGAGG	1630	9	SA-responsive element
CmOMT1	TGACG-motif	TGACG	719	5	MeJA-responsive element
CmOMT1	TGACG-motif	TGACG	1302	5	MeJA-responsive element
CmOMT2	ABRE	ACGTG	348	5	ABA-responsive element
CmOMT2	GATA-motif	AAGGATAAGG	146	9	Light responsiveness element
CmOMT2	G-box	TACGTG	347	6	Light responsiveness element
CmOMT2	GT1-motif	GGTTAA	2000	6	Light responsiveness element
CmOMT2	MRE	AACCTAA	775	7	Light responsiveness element
CmOMT2	P-box	CCTTTTG	306	7	GA-responsive element
CmOMT2	TCA-element	CCATCTTTTT	117	9	SA-responsive element
CmOMT2	TC-rich repeats	GTTTTCTTAC	150	9	Defense and stress responsiveness element
CmOMT2	TCT-motif	TCTTAC	551	6	Light responsiveness element
CmOMT2	WUN-motif	AAATTTCCT	57	9	Wound-responsive element
CmOMT3	ABRE	ACGTG	1605	5	ABA-responsive element
CmOMT3	ABRE	ACGTG	1793	5	ABA-responsive element
CmOMT3	CGTCA-motif	CGTCA	234	5	MeJA-responsive element
CmOMT3	CGTCA-motif	CGTCA	1877	5	MeJA-responsive element
CmOMT3	G-Box	CACGTT	1604	6	Light responsiveness element
CmOMT3	G-box	TACGTG	1793	6	Light responsiveness element
CmOMT3	I-box	AGATAAGG	543	8	Light responsiveness element
CmOMT3	Sp1	GGGCGG	1917	6	Light responsiveness element
CmOMT3	TC-rich repeats	GTTTTCTTAC	550	9	Defense and stress responsiveness element
CmOMT3	TCT-motif	TCTTAC	425	6	Light responsiveness element
CmOMT3	TGACG-motif	TGACG	234	5	MeJA-responsive element
CmOMT3	TGACG-motif	TGACG	1877	5	MeJA-responsive element
CmOMT4	Box 4	ATTAAT	208	6	Light responsiveness element
CmOMT4	Box 4	ATTAAT	235	6	Light responsiveness element
CmOMT4	Box 4	ATTAAT	506	6	Light responsiveness element
CmOMT4	Box 4	ATTAAT	663	6	Light responsiveness element
CmOMT4	Box 4	ATTAAT	690	6	Light responsiveness element
CmOMT4	GATA-motif	GATAGGA	110	7	Light responsiveness element
CmOMT4	G-box	CACGAC	90	6	Light responsiveness element
CmOMT4	GT1-motif	GGTTAA	621	6	Light responsiveness element
CmOMT4	MBS	CAACTG	626	6	Drought-responsive element
CmOMT4	TCT-motif	TCTTAC	413	6	Light responsiveness element
CmOMT4	TCT-motif	TCTTAC	868	6	Light responsiveness element
CmOMT4	TGA-element	AACGAC	2003	6	Auxin-responsive element
CmOMT5	TCT-motif	TCTTAC	1952	6	Light responsiveness element
CmOMT6	ABRE	ACGTG	54	5	ABA-responsive element
CmOMT6	ABRE	TACGTGTC	842	8	ABA-responsive element
CmOMT6	ABRE	ACGTG	844	5	ABA-responsive element
CmOMT6	Box 4	ATTAAT	1046	6	Light responsiveness element
CmOMT6	GATA-motif	GATAGGA	34	7	Light responsiveness element
CmOMT6	GATA-motif	GATAGGG	444	7	Light responsiveness element
CmOMT6	GATA-motif	GATAGGG	1996	7	Light responsiveness element
CmOMT6	G-box	CACGTC	53	6	Light responsiveness element
CmOMT6	G-box	TACGTG	844	6	Light responsiveness element
CmOMT6	LAMP-element	CTTTATCA	405	8	Light responsiveness element
CmOMT6	LTR	CCGAAA	883	6	Low-temperature responsiveness element
CmOMT6	TCCC-motif	TCTCCCT	411	7	Light responsiveness element
CmOMT6	TCT-motif	TCTTAC	468	6	Light responsiveness element
CmOMT6	TCT-motif	TCTTAC	900	6	Light responsiveness element
CmOMT7	ABRE	TACGGTC	844	7	ABA-responsive element
CmOMT7	ABRE	ACGTG	1873	5	ABA-responsive element
CmOMT7	ACE	CTAACGTATT	1756	9	Light responsive element
CmOMT7	Box 4	ATTAAT	173	6	Light responsiveness element
CmOMT7	Box 4	ATTAAT	254	6	Light responsiveness element
CmOMT7	Box 4	ATTAAT	425	6	Light responsiveness element
CmOMT7	Box 4	ATTAAT	932	6	Light responsiveness element
CmOMT7	Box 4	ATTAAT	1408	6	Light responsiveness element
CmOMT7	Box 4	ATTAAT	1441	6	Light responsiveness element
CmOMT7	CGTCA-motif	CGTCA	98	5	MeJA-responsive element
CmOMT7	chs-CMA1a	TTACTTAA	1222	8	Light responsiveness element
CmOMT7	G-Box	CACGTT	1872	6	Light responsiveness element
CmOMT7	GT1-motif	GGTTAAT	1658	7	Light responsiveness element
CmOMT7	GT1-motif	GGTTAA	1659	6	Light responsiveness element
CmOMT7	TCT-motif	TCTTAC	711	6	Light responsiveness element
CmOMT7	TGACG-motif	TGACG	98	5	MeJA-responsive element
CmOMT8	ATCT-motif	AATCTAATCC	1411	9	Light responsiveness element
CmOMT8	Box 4	ATTAAT	106	6	Light responsiveness element
CmOMT8	Box 4	ATTAAT	397	6	Light responsiveness element
CmOMT8	Box 4	ATTAAT	502	6	Light responsiveness element
CmOMT8	Box 4	ATTAAT	533	6	Light responsiveness element
CmOMT8	Box 4	ATTAAT	1562	6	Light responsiveness element
CmOMT8	CGTCA-motif	CGTCA	1168	5	MeJA-responsive element
CmOMT8	GA-motif	ATAGATAA	670	8	Light responsiveness element
CmOMT8	GATA-motif	AAGATAAGATT	1109	10	Light responsiveness element
CmOMT8	I-box	cCATATCCAAT	288	10	Light responsiveness element
CmOMT8	MRE	AACCTAA	781	7	Light responsiveness element
CmOMT8	TC-rich repeats	ATTCTCTAAC	389	9	Defense and stress responsiveness element
CmOMT8	TGACG-motif	TGACG	1168	5	MeJA-responsive element
CmOMT8	WUN-motif	AAATTTCCT	1259	9	Wound-responsive element
CmOMT9	ABRE	ACGTG	1944	5	ABA-responsive element
CmOMT9	Box 4	ATTAAT	319	6	Light responsiveness element
CmOMT9	Box 4	ATTAAT	323	6	Light responsiveness element
CmOMT9	Box 4	ATTAAT	332	6	Light responsiveness element
CmOMT9	Box 4	ATTAAT	336	6	Light responsiveness element
CmOMT9	CGTCA-motif	CGTCA	660	5	MeJA-responsive element
CmOMT9	CGTCA-motif	CGTCA	2012	5	MeJA-responsive element
CmOMT9	chs-CMA1a	TTACTTAA	1951	8	Light responsiveness element
CmOMT9	GATA-motif	AAGGATAAGG	506	9	Light responsiveness element
CmOMT9	G-Box	CACGTT	1943	6	Light responsiveness element
CmOMT9	GT1-motif	GGTTAA	530	6	Light responsiveness element
CmOMT9	GT1-motif	GGTTAA	785	6	Light responsiveness element
CmOMT9	GT1-motif	GGTTAA	1489	6	Light responsiveness element
CmOMT9	I-box	gGATAAGGTG	508	9	Light responsiveness element
CmOMT9	MRE	AACCTAA	527	7	Light responsiveness element
CmOMT9	MRE	AACCTAA	1613	7	Light responsiveness element
CmOMT9	TATC-box	TATCCCA	1532	7	GA-responsive element
CmOMT9	TC-rich repeats	GTTTTCTTAC	763	9	Defense and stress responsiveness element
CmOMT9	TCT-motif	TCTTAC	1159	6	Light responsiveness element
CmOMT9	TGACG-motif	TGACG	660	5	MeJA-responsive element
CmOMT9	TGACG-motif	TGACG	2012	5	MeJA-responsive element
CmOMT9	TGA-element	AACGAC	698	6	Auxin-responsive element
CmOMT10	ABRE	CACGTG	278	6	ABA-responsive element
CmOMT10	ABRE	ACGTG	279	5	ABA-responsive element
CmOMT10	CGTCA-motif	CGTCA	1194	5	MeJA-responsive element
CmOMT10	GA-motif	ATAGATAA	821	8	Light responsiveness element
CmOMT10	GATA-motif	AAGGATAAGG	645	9	Light responsiveness element
CmOMT10	G-Box	CACGTG	278	6	Light responsiveness element
CmOMT10	G-box	CACGTG	278	6	Light responsiveness element
CmOMT10	GT1-motif	GGTTAA	112	6	Light responsiveness element
CmOMT10	GT1-motif	GTGTGTGAA	1949	9	Light responsiveness element
CmOMT10	I-box	TAGATAACC	270	9	Light responsiveness element
CmOMT10	I-box	AGATAAGG	647	8	Light responsiveness element
CmOMT10	I-box	TGATAATGT	1957	9	Light responsiveness element
CmOMT10	MRE	AACCTAA	993	7	Light responsiveness element
CmOMT10	TGACG-motif	TGACG	1194	5	MeJA-responsive element
CmOMT10	TGA-element	AACGAC	767	6	Auxin-responsive element
CmOMT10	TGA-element	AACGAC	1109	6	Auxin-responsive element
CmOMT11	ABRE	AACCCGG	61	7	ABA-responsive element
CmOMT11	ABRE	ACGTG	1948	5	ABA-responsive element
CmOMT11	AE-box	AGAAACTT	1598	8	Light responsiveness element
CmOMT11	AuxRR-core	GGTCCAT	1722	7	Auxin-responsive element
CmOMT11	Box 4	ATTAAT	984	6	Light responsiveness element
CmOMT11	Box 4	ATTAAT	1016	6	Light responsiveness element
CmOMT11	Box 4	ATTAAT	1041	6	Light responsiveness element
CmOMT11	Box 4	ATTAAT	1122	6	Light responsiveness element
CmOMT11	Box 4	ATTAAT	1145	6	Light responsiveness element
CmOMT11	Box 4	ATTAAT	1194	6	Light responsiveness element
CmOMT11	G-box	TACGTG	1947	6	Light responsiveness element
CmOMT11	GT1-motif	GGTTAAT	920	7	Light responsiveness element
CmOMT11	GT1-motif	GGTTAA	921	6	Light responsiveness element
CmOMT11	LAMP-element	CTTTATCA	761	8	Light responsiveness element
CmOMT11	MBS	CAACTG	404	6	Drought-responsive element
CmOMT11	P-box	CCTTTTG	166	7	GA-responsive element
CmOMT11	P-box	CCTTTTG	1972	7	GA-responsive element
CmOMT11	TATC-box	TATCCCA	808	7	GA-responsive element
CmOMT11	TATC-box	TATCCCA	2010	7	GA-responsive element
CmOMT11	TCA-element	CCATCTTTTT	1465	9	SA-responsive element
CmOMT11	TCCC-motif	TCTCCCT	1935	7	Light responsiveness element
CmOMT11	TCT-motif	TCTTAC	420	6	Light responsiveness element
CmOMT12	ABRE	ACGTG	598	5	ABA-responsive element
CmOMT12	ABRE	CGCACGTGTC	605	9	ABA-responsive element
CmOMT12	AE-box	AGAAACAA	1639	8	Light responsiveness element
CmOMT12	AE-box	AGAAACAA	1866	8	Light responsiveness element
CmOMT12	AE-box	AGAAACAA	1873	8	Light responsiveness element
CmOMT12	ATCT-motif	AATCTAATCC	370	9	Light responsiveness element
CmOMT12	Box 4	ATTAAT	37	6	Light responsiveness element
CmOMT12	Box 4	ATTAAT	1459	6	Light responsiveness element
CmOMT12	G-box	CACGAC	180	6	Light responsiveness element
CmOMT12	G-box	CACGTC	597	6	Light responsiveness element
CmOMT12	GT1-motif	GGTTAA	156	6	Light responsiveness element
CmOMT12	GT1-motif	GGTTAA	1201	6	Light responsiveness element
CmOMT12	MBS	CAACTG	279	6	Drought-responsive element
CmOMT12	MRE	AACCTAA	417	7	Light responsiveness element
CmOMT12	MRE	AACCTAA	902	7	Light responsiveness element
CmOMT12	MRE	AACCTAA	1198	7	Light responsiveness element
CmOMT12	P-box	CCTTTTG	1635	7	GA-responsive element
CmOMT12	Sp1	GGGCGG	588	6	Light responsiveness element
CmOMT12	Sp1	GGGCGG	682	6	Light responsiveness element
CmOMT12	TCA-element	CCATCTTTTT	1003	9	SA-responsive element
CmOMT12	TCA-element	CCATCTTTTT	1227	9	SA-responsive element
CmOMT12	TCCC-motif	TCTCCCT	1995	7	Light responsiveness element
CmOMT12	TC-rich repeats	GTTTTCTTAC	1808	9	Defense and stress responsiveness element
CmOMT12	TCT-motif	TCTTAC	141	6	Light responsiveness element
CmOMT12	TCT-motif	TCTTAC	1812	6	Light responsiveness element
CmOMT13	AT1-motif	AATTATTTTTTATT	1081	13	Light responsiveness element
CmOMT13	Box 4	ATTAAT	43	6	Light responsiveness element
CmOMT13	Box 4	ATTAAT	323	6	Light responsiveness element
CmOMT13	Box 4	ATTAAT	596	6	Light responsiveness element
CmOMT13	Box 4	ATTAAT	786	6	Light responsiveness element
CmOMT13	Box 4	ATTAAT	913	6	Light responsiveness element
CmOMT13	Box 4	ATTAAT	1448	6	Light responsiveness element
CmOMT13	Box 4	ATTAAT	1481	6	Light responsiveness element
CmOMT13	Box 4	ATTAAT	1739	6	Light responsiveness element
CmOMT13	GA-motif	ATAGATAA	1691	8	Light responsiveness element
CmOMT13	G-box	CACGAC	477	6	Light responsiveness element
CmOMT13	GT1-motif	GTGTGTGAA	2004	9	Light responsiveness element
CmOMT13	LTR	CCGAAA	503	6	Low-temperature responsiveness element
CmOMT13	LTR	CCGAAA	1227	6	Low-temperature responsiveness element
CmOMT13	MBS	CAACTG	532	6	Drought-responsive element
CmOMT13	TCT-motif	TCTTAC	931	6	Light responsiveness element
CmOMT14	ABRE	ACGTG	1143	5	ABA-responsive element
CmOMT14	Box 4	ATTAAT	1471	6	Light responsiveness element
CmOMT14	Box 4	ATTAAT	1501	6	Light responsiveness element
CmOMT14	Box 4	ATTAAT	1760	6	Light responsiveness element
CmOMT14	Box 4	ATTAAT	1764	6	Light responsiveness element
CmOMT14	Box 4	ATTAAT	1768	6	Light responsiveness element
CmOMT14	Box 4	ATTAAT	1772	6	Light responsiveness element
CmOMT14	Box 4	ATTAAT	1776	6	Light responsiveness element
CmOMT14	CGTCA-motif	CGTCA	117	5	MeJA-responsive element
CmOMT14	CGTCA-motif	CGTCA	494	5	MeJA-responsive element
CmOMT14	GATA-motif	AAGATAAGATT	1422	10	Light responsiveness element
CmOMT14	G-box	CACGAC	235	6	Light responsiveness element
CmOMT14	G-box	CACGTC	1143	6	Light responsiveness element
CmOMT14	I-box	GATAAGGGT	1008	9	Light responsiveness element
CmOMT14	I-box	AGATAAGG	1010	8	Light responsiveness element
CmOMT14	Sp1	GGGCGG	503	6	Light responsiveness element
CmOMT14	TCA-element	CCATCTTTTT	896	9	SA-responsive element
CmOMT14	TCCC-motif	TCTCCCT	1072	7	Light responsiveness element
CmOMT14	TGACG-motif	TGACG	117	5	MeJA-responsive element
CmOMT14	TGACG-motif	TGACG	494	5	MeJA-responsive element
CmOMT15	TCT-motif	TCTTAC	2012	6	Light responsiveness element
CmOMT15	TGA-element	AACGAC	1761	6	Auxin-responsive element
CmOMT16	3-AF1 binding site	TAAGAGAGGAA	1471	10	Light responsiveness element
CmOMT16	AE-box	AGAAACAA	702	8	Light responsiveness element
CmOMT16	AE-box	AGAAACTT	1456	8	Light responsiveness element
CmOMT16	Box 4	ATTAAT	1404	6	Light responsiveness element
CmOMT16	GA-motif	ATAGATAA	932	8	Light responsiveness element
CmOMT16	GATA-motif	AAGATAAGATT	451	10	Light responsiveness element
CmOMT16	GT1-motif	GGTTAAT	1056	7	Light responsiveness element
CmOMT16	GT1-motif	GGTTAAT	1489	7	Light responsiveness element
CmOMT16	GT1-motif	GGTTAA	1490	6	Light responsiveness element
CmOMT16	GT1-motif	GGTTAAT	1717	7	Light responsiveness element
CmOMT16	TCA-element	CCATCTTTTT	1991	9	SA-responsive element
CmOMT16	TC-rich repeats	ATTCTCTAAC	1526	9	Defense and stress responsiveness element
CmOMT16	TGA-element	AACGAC	1356	6	Auxin-responsive element
CmOMT17	ABRE	CGCACGTGTC	286	9	ABA-responsive element
CmOMT17	ABRE	CACGTG	288	6	ABA-responsive element
CmOMT17	ABRE	ACGTG	289	5	ABA-responsive element
CmOMT17	ABRE	ACGTG	1209	5	ABA-responsive element
CmOMT17	Box 4	ATTAAT	552	6	Light responsiveness element
CmOMT17	Box 4	ATTAAT	676	6	Light responsiveness element
CmOMT17	Box 4	ATTAAT	1615	6	Light responsiveness element
CmOMT17	G-box	CACGTG	288	6	Light responsiveness element
CmOMT17	G-box	CACGAC	933	6	Light responsiveness element
CmOMT17	G-box	TACGTG	1208	6	Light responsiveness element
CmOMT17	G-Box	CACGTG	288	6	Light responsiveness element
CmOMT17	GT1-motif	GGTTAA	1186	6	Light responsiveness element
CmOMT17	I-box	atGATAAGGTC	925	10	Light responsiveness element
CmOMT17	I-box	TGATAATGT	926	9	Light responsiveness element
CmOMT17	MBS	CAACTG	1487	6	Drought-responsive element
CmOMT17	P-box	CCTTTTG	606	7	GA-responsive element
CmOMT17	TGA-element	AACGAC	281	6	Auxin-responsive element
CmOMT18	3-AF1 binding site	TAAGAGAGGAA	1472	10	Light responsiveness element
CmOMT18	ABRE	ACGTG	1268	5	ABA-responsive element
CmOMT18	CGTCA-motif	CGTCA	651	5	MeJA-responsive element
CmOMT18	CGTCA-motif	CGTCA	723	5	MeJA-responsive element
CmOMT18	CGTCA-motif	CGTCA	1841	5	MeJA-responsive element
CmOMT18	GA-motif	ATAGATAA	385	8	Light responsiveness element
CmOMT18	GATA-motif	AAGGATAAGG	1481	9	Light responsiveness element
CmOMT18	G-Box	CACGTT	1267	6	Light responsiveness element
CmOMT18	GT1-motif	GGTTAA	171	6	Light responsiveness element
CmOMT18	MRE	AACCTAA	1337	7	Light responsiveness element
CmOMT18	TCCC-motif	TCTCCCT	808	7	Light responsiveness element
CmOMT18	TCCC-motif	TCTCCCT	849	7	Light responsiveness element
CmOMT18	TCCC-motif	TCTCCCT	1096	7	Light responsiveness element
CmOMT18	TC-rich repeats	GTTTTCTTAC	819	9	Defense and stress responsiveness element
CmOMT18	TCT-motif	TCTTAC	1526	6	Light responsiveness element
CmOMT18	TCT-motif	TCTTAC	1578	6	Light responsiveness element
CmOMT18	TGA-box	TGACGTAA	723	8	Auxin-responsive element
CmOMT18	TGACG-motif	TGACG	651	5	MeJA-responsive element
CmOMT18	TGACG-motif	TGACG	723	5	MeJA-responsive element
CmOMT18	TGACG-motif	TGACG	1841	5	MeJA-responsive element
CmOMT18	TGA-element	AACGAC	284	6	Auxin-responsive element
CmOMT19	ATCT-motif	AATCTAATCC	1647	9	Light responsiveness element
CmOMT19	GT1-motif	GGTTAAT	1622	7	Light responsiveness element
CmOMT19	GT1-motif	GGTTAA	1623	6	Light responsiveness element
CmOMT19	Sp1	GGGCGG	1944	6	Light responsiveness element
CmOMT19	TCCC-motif	TCTCCCT	1724	7	Light responsiveness element
CmOMT20	ABRE	TACGTGTC	1010	8	ABA-responsive element
CmOMT20	ABRE	ACGTG	1012	5	ABA-responsive element
CmOMT20	AE-box	AGAAACTT	687	8	Light responsiveness element
CmOMT20	AuxRR-core	GGTCCAT	291	7	Auxin-responsive element
CmOMT20	AuxRR-core	GGTCCAT	1297	7	Auxin-responsive element
CmOMT20	Box 4	ATTAAT	301	6	Light responsiveness element
CmOMT20	Box 4	ATTAAT	734	6	Light responsiveness element
CmOMT20	Box 4	ATTAAT	1004	6	Light responsiveness element
CmOMT20	CGTCA-motif	CGTCA	1078	5	MeJA-responsive element
CmOMT20	chs-CMA1a	TTACTTAA	228	8	Light responsiveness element
CmOMT20	G-box	TAACACGTAG	100	9	Light responsiveness element
CmOMT20	G-box	TACGTG	1012	6	Light responsiveness element
CmOMT20	GT1-motif	GGTTAA	321	6	Light responsiveness element
CmOMT20	GT1-motif	GGTTAA	683	6	Light responsiveness element
CmOMT20	GT1-motif	GGTTAAT	1631	7	Light responsiveness element
CmOMT20	LTR	CCGAAA	429	6	Low-temperature responsiveness element
CmOMT20	LTR	CCGAAA	780	6	Low-temperature responsiveness element
CmOMT20	LTR	CCGAAA	1563	6	Low-temperature responsiveness element
CmOMT20	MBS	CAACTG	310	6	Drought-responsive element
CmOMT20	MRE	AACCTAA	217	7	Light responsiveness element
CmOMT20	MRE	AACCTAA	680	7	Light responsiveness element
CmOMT20	MRE	AACCTAA	801	7	Light responsiveness element
CmOMT20	TCA-element	CCATCTTTTT	636	9	SA-responsive element
CmOMT20	TCT-motif	TCTTAC	692	6	Light responsiveness element
CmOMT20	TGACG-motif	TGACG	1078	5	MeJA-responsive element
CmOMT21	ABRE	GACACGTGGC	276	9	ABA-responsive element
CmOMT21	ABRE	CACGTG	278	6	ABA-responsive element
CmOMT21	ABRE	ACGTG	279	5	ABA-responsive element
CmOMT21	ABRE	ACGTG	1046	5	ABA-responsive element
CmOMT21	ACE	CTAACGTATT	943	9	Light responsive element
CmOMT21	AE-box	AGAAACAA	1227	8	Light responsiveness element
CmOMT21	AE-box	AGAAACAA	1600	8	Light responsiveness element
CmOMT21	Box 4	ATTAAT	1309	6	Light responsiveness element
CmOMT21	GARE-motif	TCTGTTG	1436	7	GA-responsive element
CmOMT21	G-Box	CACGTG	278	6	Light responsiveness element
CmOMT21	G-box	CACGTG	278	6	Light responsiveness element
CmOMT21	G-box	TACGTG	1046	6	Light responsiveness element
CmOMT21	GT1-motif	GGTTAA	200	6	Light responsiveness element
CmOMT21	GT1-motif	GGTTAA	1995	6	Light responsiveness element
CmOMT21	MRE	AACCTAA	202	7	Light responsiveness element
CmOMT21	P-box	CCTTTTG	549	7	GA-responsive element
CmOMT21	TCA-element	CCATCTTTTT	1463	9	SA-responsive element
CmOMT21	TC-rich repeats	GTTTTCTTAC	1149	9	Defense and stress responsiveness element
CmOMT21	TCT-motif	TCTTAC	1149	6	Light responsiveness element
CmOMT21	TCT-motif	TCTTAC	1485	6	Light responsiveness element
