# Supplementary material for: Genome-wide identification of the OMT gene family in Cucumis melo L. and expression analysis under abiotic and biotic stress
Source: PeerJ. 2023 Dec 14;11:e16483. doi: 10.7717/peerj.16483 (PMC10725674; doi:10.7717/peerj.16483)
Supplement: Supplemental Information 8 — Published RNA-seq datasets were used to evaluate CmOMT genes (Yano et al., 2020). [file peerj-11-16483-s008.xlsx]

## Sheet: Sheet1
Table S8. Tissue space expression profile of CmOMT genes under normal growth conditions. Published RNA-seq datasets were used to evaluate CmOMT genes (Yano et al., 2020)
gene ID	Callus	Dry seeds	Root	Stem		Shoot apex	Leaf				Tendril	flower			Ovary			Fruit flesh							Fruit epicarp
				downside	upside		young	6th	9th	12th		Anther male	Petal femal	Stigma female	DAF0	DAF2	DAF4	DAF8	DAF15	DAF22	DAF29	DAF36	DAF43	DAF50	DAF8	DAF15	DAF22	DAF29	DAF36	DAF43	DAF50
CmOMT1	0.418475	0	23.0038	4.14988	15.6839	4.41224	3.66509	0	0.765642	1.14584	4.65997	1.14367	10.5742	13.3556	4.40405	5.92712	4.50219	26.6846	52.0056	109.629	97.2721	64.7442	53.7334	29.5667	30.0182	46.2522	213.798	208.066	40.4527	80.8202	48.7779
CmOMT5	2.69278	0	51.9267	1.05661	0.372498	0	0	0	0.214694	0	0.129863	0	0	0.616636	0	0	0	0	0	0	0.159149	0	0	0	0.490699	0.8141	0	1.4289	0	0	0
CmOMT8	0.236721	0	0	0	0.368957	1.57436	2.8065	0	0.312496	0	0.829514	1.23869	17.7841	6.50699	2.35993	0.486878	0	0	0	0	0	0	0	0	0	0	0	0	0	0	0
CmOMT9	3.33128	0	3.52994	6.86442	3.86136	12.4541	3.63721	3.13121	7.22708	9.56757	10.2573	11.9332	276.715	81.5414	5.86057	7.85179	1.58579	0	0.117313	0	0	0	0	0	0	0.346916	0.290696	1.88667	0.169832	0.791747	0.404531
CmOMT10	0	0	21.2039	26.8621	31.417	1.43491	1.73683	10.9707	12.219	8.81425	14.2526	0.358053	0	10.0376	9.01511	4.85053	2.38503	1.01998	5.9769	2.06236	1.17617	0.591162	0	0	0.595321	1.69091	0	0.433903	0	0	0
CmOMT11	0	0	5.55487	0	0.295168	0.049241	0	0	0	0	0	0	0	0	0	0	0	0	0	0	0	0	0	0	0	0	0	0	0	0	0
CmOMT12	0.147624	0	0	0	0	0.167839	0	0	0.153699	0	0	0	0.223536	0	0.467294	0	0	0	0	0	0	0	0	0	0	0	0	0	0	0	0
CmOMT13	0	0	0.167932	0.292627	0	0.702737	0.814069	0	0	0	0	0.437601	0	0.650133	0	0	0	0	0	0	0	0	0	0	0	0	0	0	0	0	0
CmOMT14	0.355957	4.39767	0	2.49719	23.849	93.9727	98.0128	19.2289	16.2359	16.7023	21.8982	3.02877	6.6986	37.6112	32.8017	28.5638	19.7763	21.4929	25.8411	25.2807	21.8329	19.3671	40.6233	97.2836	24.243	25.4751	43.5211	25.5333	42.0996	36.1199	12.7911
CmOMT15	0	0	0	0	0	0	0	0	0	0	0	0	0	0.381105	0.381478	0	0	0	0.458905	2.15409	4.88426	6.23534	14.3562	67.8898	0.119446	5.62919	24.8561	85.6316	53.7385	72.6625	111.34
CmOMT16	7.62155	0	37.4216	9.53175	5.50767	1.54693	1.36128	0.513576	1.28872	0.866357	1.89008	2.89893	0.092173	53.9084	3.47442	3.31527	3.66137	6.37064	4.26107	3.85364	3.43633	1.96731	3.25096	7.89851	2.51228	5.03528	5.25652	20.4441	7.38407	24.1777	16.4917
CmOMT18	13.7586	0	173.065	126.638	83.0674	51.715	69.2075	21.5736	25.1606	36.1382	147.946	84.696	19.1588	37.9633	29.822	35.4625	20.6067	28.937	28.8617	58.7579	98.4596	72.9664	63.0059	42.8471	45.1541	38.6597	129.68	90.3614	65.9537	69.9683	65.5809
CmOMT19	0	0	0	0	0	0	0	0	0	0	0	0	0	0	0.990396	0	0	0	0	0	0	0	0	0	0	0	0	0	0	0	0
CmOMT20	2.82028	0	0	0	0	0.632691	0.578139	0	0	0	0	0	0	0	0	0	0	0	0	0	0	0	0	0	0	0	0	0	0	0	0
CmOMT21	6.43447	0.191369	41.8245	4.39587	8.4436	1.91663	3.72173	0.630286	0.122817	0.617078	2.69546	0.426551	0	0.292285	0.624836	0.577636	0.758038	0.713457	0	2.23241	0.253423	1.31021	1.62238	0	0.473199	0	1.46382	5.64956	2.03005	4.49774	2.65266
