# Supplementary material for: Genome-wide identification of the OMT gene family in Cucumis melo L. and expression analysis under abiotic and biotic stress
Source: PeerJ. 2023 Dec 14;11:e16483. doi: 10.7717/peerj.16483 (PMC10725674; doi:10.7717/peerj.16483)
Supplement: Supplemental Information 10 [file peerj-11-16483-s010.pdf]

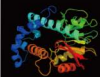

CmOMT1

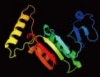

CmOMT2

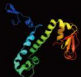

CmOMT3

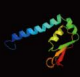

CmOMT4

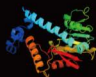

CmOMT5

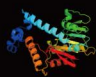

CmOMT6

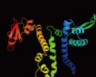

CmOMT7

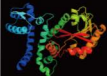

CmOMT8

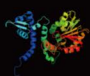

CmOMT9

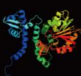

CmOMT10

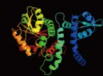

CmOMT11

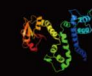

CmOMT12

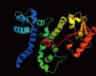

CmOMT13

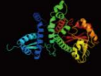

CmOMT14

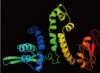

CmOMT15

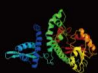

CmOMT16

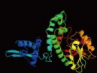

CmOMT17

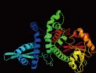

CmOMT18

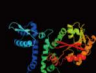

CmOMT19

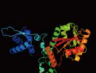

CmOMT20

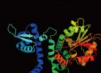

CmOMT21
