# Supplementary material for: Genome-wide identification of the OMT gene family in Cucumis melo L. and expression analysis under abiotic and biotic stress
Source: PeerJ. 2023 Dec 14;11:e16483. doi: 10.7717/peerj.16483 (PMC10725674; doi:10.7717/peerj.16483)
Supplement: Supplemental Information 13 [file peerj-11-16483-s013.xlsx]

## Sheet: Salt Stress
Raw data of qPCR in salt stress
Target	Sample	2-ddC(t)			Mean	STEV
CmOMT6	0 d	1.00013	0.979072	1.02584	1.00168	0.0191241
	1 d	0.765982	0.873175	0.69014	0.776432	0.0750882
	3 d	0.982637	0.981616	1.1802	1.04815	0.0933732
	5 d	1.27987	1.28012	1.37931	1.3131	0.0468177
	7 d	1.24013	1.25683	1.33691	1.27796	0.0422408
CmOMT9	0 d	0.981034	0.990023	1.07	1.01369	0.0399895
	1 d	0.629158	0.690361	0.679983	0.666501	0.026743
	3 d	1.62915	1.64894	2.19499	1.82436	0.2622
	5 d	2.21941	1.98941	2.01941	2.07608	0.102089
	7 d	1.17913	1.38915	1.48933	1.35254	0.129255
CmOMT12	0 d	0.980237	1.04373	0.999125	1.0077	0.026622
	1 d	0.631362	0.678891	0.719023	0.676425	0.0358299
	3 d	0.681596	0.766864	0.769897	0.739452	0.0409293
	5 d	0.563148	0.646439	0.775136	0.661574	0.087203
	7 d	0.839942	0.854316	0.865011	0.85309	0.010271
CmOMT14	0 d	0.988194	0.992039	1.15639	1.04554	0.0783973
	1 d	1.34693	1.43855	1.50571	1.4304	0.065079
	3 d	1.87635	2.02537	2.18754	2.02975	0.127083
	5 d	1.20915	1.23354	1.57372	1.33881	0.16641
	7 d	0.64261	0.7417	0.832942	0.739084	0.0777245
CmOMT18	0 d	0.818136	1.00663	1.18081	1.00186	0.1481
	1 d	2.71358	2.8301	3.01138	2.85168	0.122532
	3 d	2.79415	3.22633	3.23974	3.08674	0.206965
	5 d	2.66996	2.731	2.93291	2.77796	0.112365
	7 d	2.53419	2.51849	2.17995	2.41088	0.163414
CmOMT21	0 d	1.00132	1.01663	1.28979	1.10258	0.132526
	1 d	1.08363	1.11252	1.16538	1.12051	0.0338495
	3 d	1.66473	1.77369	1.79372	1.74405	0.0566791
	5 d	1.09535	1.20843	1.32372	1.20917	0.0932323
	7 d	1.55593	1.56197	1.82337	1.64709	0.124674

## Sheet: Chilling Stress
Raw data of qPCR in chilling stress
Target	Sample	2-ddC(t)			Mean	STEV
CmOMT2	0 h	0.998357	1.00002	1.04582	1.01473	0.0219953
	6 h	0.683629	0.702162	0.843923	0.743238	0.0715959
	12 h	0.746359	0.842957	0.903741	0.831019	0.0648031
CmOMT12	0 h	0.902483	0.921296	1.18179	1.00186	0.127465
	6 h	0.667724	0.989014	1.05336	0.903365	0.168681
	12 h	0.856355	0.899258	0.921348	0.89232	0.0269832
CmOMT14	0 h	0.893315	1.00434	1.21444	1.03736	0.133162
	6 h	1.53289	1.57974	1.57738	1.56334	0.0215486
	12 h	1.57036	1.48035	1.41528	1.48866	0.0635856
CmOMT18	0 h	0.983148	1.00113	1.13885	1.04105	0.0695502
	6 h	1.51375	1.75265	1.99336	1.75326	0.195803
	12 h	2.53622	2.66261	2.81147	2.6701	0.112496

## Sheet: HTH Stress
Raw data of qPCR in HTH stress
Target	Sample	2-ddC(t)			Mean	STEV
CmOMT14	0 d	0.934732	1	1.08919	1.00798	0.0633103
	1 d	1.59664	1.7779	1.77335	1.71596	0.0843947
	3 d	1.91245	1.91462	2.05356	1.96021	0.0660146
	5 d	1.56335	1.66399	1.83583	1.68773	0.112498
	7 d	1.96872	2.02474	2.12416	2.03921	0.0642765
CmOMT9	0 d	0.863364	1.00017	1.16238	1.00864	0.12222
	1 d	1.84385	1.86166	2.02527	1.91026	0.0816486
	3 d	1.85662	1.90745	2.03454	1.93287	0.0748245
	5 d	2.19741	2.37571	2.50884	2.36065	0.127583
	7 d	1.87515	1.99123	2.08792	1.98477	0.0869868
